# Supplementary material for: Complementary light absorption and efficient exciton dissociation lead to efficient and excellent ternary polymer solar cells
Source: Royal Society of Chemistry journal article supplement (doi:10.1039/c9ta12046g), 2020-01-01
Supplement: c9ta12046g1.pdf [file c9ta12046g1.pdf]

## Supporting Information

# Complementary Light Absorption and Efficient Exciton Dissociation Lead to Efficient and Excellent Ternary Polymer Solar Cells

Zhiyong Liu<sup>a\*</sup> and Ning Wang<sup>b\*</sup>

<sup>a</sup>School of Physics and Electronic Sciences, Changsha University of Science and Technology,  
Changsha, China

<sup>b</sup>Key Laboratory of Physics and Technology for Advanced Batteries (Ministry of Education),  
College of Physics, Jilin University, Changchun 130012, People's Republic of China

\*Corresponding authors: (zhiyongliu1982@hotmail.com (Z.Y. Liu); ningwang@jlu.edu.cn (N.  
Wang))

## 4. Experimental details

### 4.1 Materials

J61, PffBTT2-DPPT2 and Y6 were purchased from Solarmer Materials, Inc. *o*-Dichlorobenzene (ODCB) was purchased from Sigma-Aldrich Co. MoO<sub>3</sub> and Ag were purchased from Alfa Aesar Co. The donor blend and the acceptor were dissolved in ODCB. The donor blend to acceptor ratio was 1:1.3 (the concentration was 23 mg mL<sup>-1</sup> in total), and the J61:PffBTT2-DPPT2 ratio was changed according to the measurement. The ZnO solution was synthesized by a sol-gel method<sup>1,2</sup>.

### 4.2 PSC preparation and characteristics

Indium–tin-oxide (ITO) glasses were ultrasonicated at 30 °C in isopropyl alcohol, acetone and deionized water for 30 min. We fabricated ZnO films by spin-coating a ZnO solution onto the ITO glass and baking at 150 °C for 20 min in air. Then, the photoactive layer solution was spin-coated on the top of the ZnO films in a N<sub>2</sub>-filled glove box and subjected to a thermal annealing treatment at 130 °C for 10 min in a N<sub>2</sub>-filled glove box (nominal thickness of ~100 nm). Finally, the MoO<sub>3</sub> layer and Ag films were fabricated by evaporation under a vacuum, and the photoactive area was 9 mm<sup>2</sup> (3×3 mm<sup>2</sup>). The PSC configuration is ITO/ZnO/J61:PffBTT2-DPPT2:Y6/MoO<sub>3</sub>/Ag.

The current density versus voltage ( $J$ – $V$ ) characteristics were measured in a glove box with a computer-controlled Keithley 236 Source Measure Unit under illumination at 100 mW cm<sup>-2</sup> using an AM 1.5 G solar simulator. The *EQE* spectrum was measured with a Stanford Research Systems model SR830 digital signal processor (DSP) lock-in amplifier coupled to a WDG3 monochromator and a 500-W xenon lamp.

While the  $I = 0$ , the slope of the  $J$ - $V$  curves is defined as  $R_S$ , and the slope of the  $J$ - $V$  curves is defined as  $R_{SH}$  under the  $V = 0$  condition, according to the following expressions<sup>3,4</sup>:

$$\left(\frac{dI}{dV}\right)_{I=0} = \frac{1}{R_S}$$

$$\left(\frac{dI}{dV}\right)_{V=0} = \frac{1}{R_{SH}}$$

Thus, under the best condition, the  $R_S = 0$  and  $R_{SH} \rightarrow \infty$ , which is corresponding to the  $FF = 1$ .

### 4.3 SCLC preparation and characteristics

The configurations of the hole-only and electron-only SCLC devices were ITO/PEDOT:PSS/photoactive layer/Au and Al/photoactive layer/Al, respectively, and the photoactive layer in the ternary films of J61:PffBTT2-DPPT2:Y6 depended on the ratio of J61:PffBTT2-DPPT2. The charge carrier mobilities were calculated according to the following equation<sup>5,6</sup>:

$$J = \frac{9}{8} \varepsilon_r \varepsilon_0 \mu \frac{V^2}{d^3}$$

$$\mu = \mu_0 \exp\left[0.89\gamma \sqrt{\frac{V}{L}}\right]$$

where  $J$  is the current density;  $\mu$  is the charge carrier mobility;  $\varepsilon_0$  ( $8.85 \times 10^{-14}$  F/cm) is the permittivity of free space;  $\varepsilon_r$  is the relative permittivity of the material ( $\varepsilon_r$  was assumed to be 3); and  $V$  is the SCLC effective voltage<sup>7</sup>.

### 4.4 XRD characteristics

The diffraction angles are related to the inter-planar distances of the atomic structure of the photoactive layer and are related by Bragg's law<sup>8</sup>:

$$\lambda = 2d \sin \theta$$

where  $\lambda$  is the wavelength of the X-ray radiation used (0.154 nm),  $\theta$  is the peak position half-angle, and  $d$  is the inter-planar distance.

#### 4.5 DSC characteristics

According to Flory-Huggins theory, the high  $\chi$  value indicates immiscibility of two materials, the  $\chi$  parameter were calculated according to below formula <sup>9</sup>:

$$\frac{1}{T_{m,2}} - \frac{1}{T_{m,2}^0} = -\frac{R}{\Delta H_2} \left[ \frac{\ln(\phi_2)}{m_2} + \left( \frac{1}{m_2} - \frac{1}{m_1} \right) (1 - \phi_2) + \chi (1 - \phi_2)^2 \right]$$

Where  $T$  is the absolute temperature, the subscript 1 and 2 corresponds to PffBTT2-DPPT2 and J61, respectively.  $T_{m,2}$  is melting temperature of J61 in the J61:PffBTT2-DPPT2 films,  $T_{m,2}^0$  is melting temperature of neat J61,  $R$  is the ideal gas constant,  $\Delta H_2$  is the enthalpy of fusion of J61 in neat film,  $\phi_2$  is the composition of J61,  $m_1$  and  $m_2$  are the degree of polymerization of PffBTT2-DPPT2 and J61, respectively.

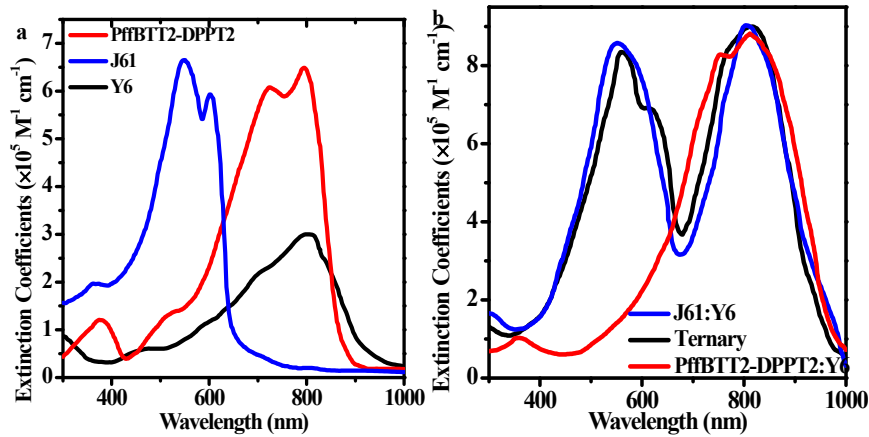

**Figure S1.** The extinction coefficients of neat materials for (a) and blend films for (b).

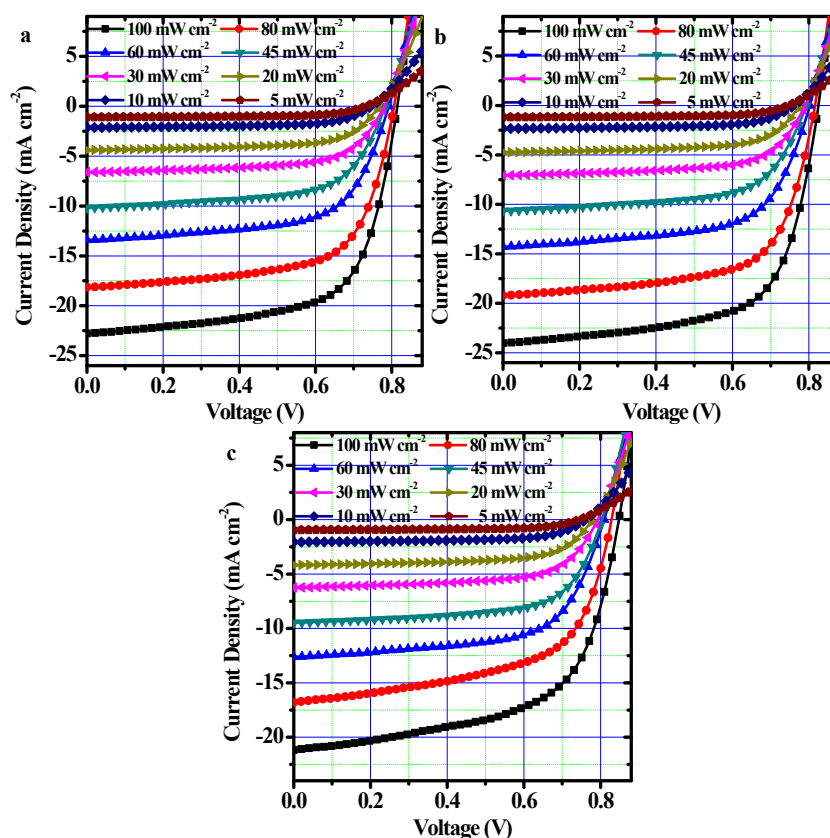

**Figure S2.**  $J$ - $V$  characteristics under various light intensities ranging from 100  $\text{mW cm}^{-2}$  to 5  $\text{mW cm}^{-2}$  for the binary J61:Y6 PSCs, the optimized ternary J61:PffBTT2-DPPT2:Y6-based PSC and the binary PffBTT2-DPPT2:Y6-based PSCs corresponding to Figure S2(a), S2(b) and S2(c), respectively.

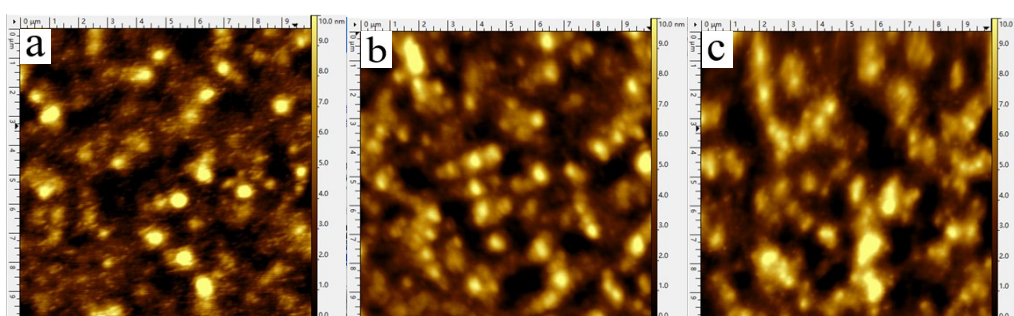

**Figure S3.** AFM images ( $10 \times 10 \mu\text{m}^2$ ) of the fresh binary J61:Y6 (a), optimized ternary J61:PffBTT2-DPPT2:Y6 (b) and binary PffBTT2-DPPT2:Y6 films (c).

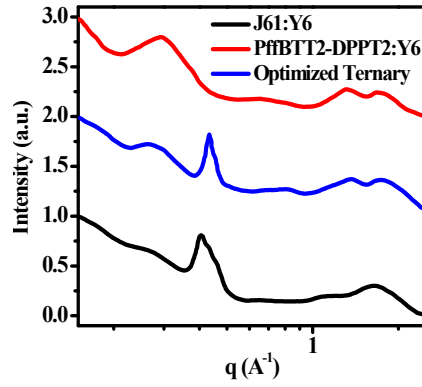

**Figure S4.** The XRD curves of the binary J61:Y6 and PffBTT2-DPPT2:Y6 films and the ternary J61:PffBTT2-DPPT2:Y6 films.

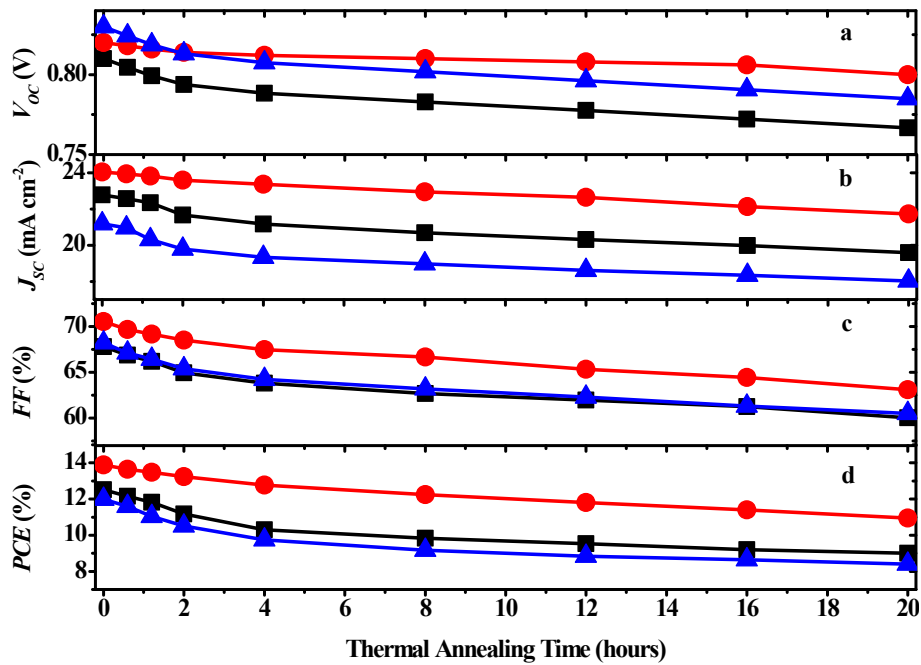

**Figure S5.** Photovoltaic parameters ( $V_{OC}$ ,  $J_{SC}$ , FF, and PCE) as a function of the thermal annealing time. The black square, red circle, and blue triangle represent the binary J61:Y6 PSCs, the optimized ternary J61:PffBTT2-DPPT2:Y6 PSCs and the binary PffBTT2-DPPT2:Y6 PSCs, respectively.

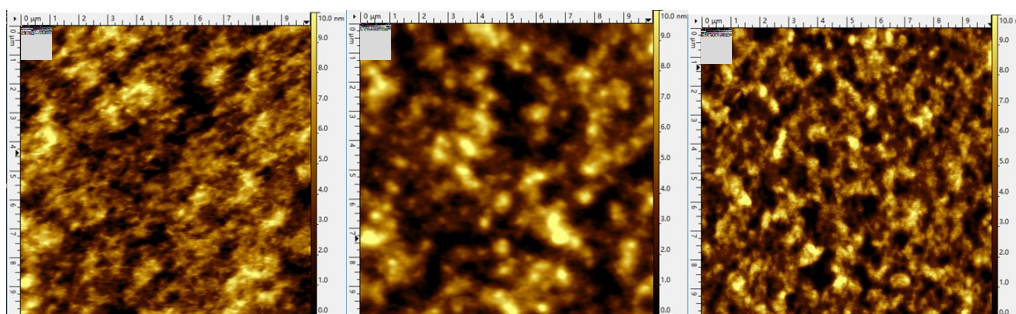

**Figure S6.** AFM images ( $10 \times 10 \mu\text{m}^2$ ) for the binary J61:Y6 (a), optimized ternary J61:PffBTT2-DPPT2:Y6 (b) and binary PffBTT2-DPPT2:Y6 films (c) under a thermal annealing treatment at  $80^\circ\text{C}$  for 20 hours.

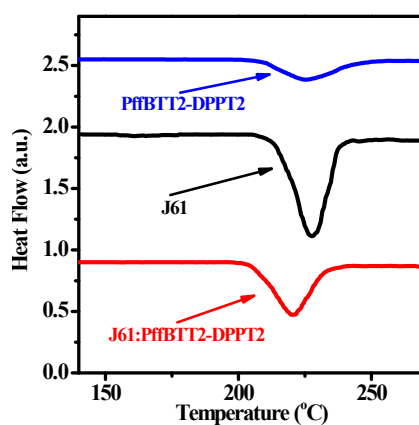

**Figure S7.** DSC curve of the neat J61 and PffBTT2-DPPT2 films and the optimized blend films of J61 and PffBTT2-DPPT2 under the high temperature thermal annealing treatment (the temperature changes between the  $140^\circ\text{C}$  and  $270^\circ\text{C}$  regions).

## Reference:

1. W. Yu, L. Huang, D. Yang, P. Fu, L. Zhou, J. Zhang and C. Li, *Journal of Materials Chemistry A*, 2015, **3**, 10660-10665.
2. U. Galan, Y. Lin, G. J. Ehlert and H. A. Sodano, *Composites Science and Technology*, 2011, **71**, 946-954.
3. F. Ghani, M. Duke and J. Carson, *Solar Energy*, 2013, **91**, 422-431.
4. P. A. Chate, P. P. Hankare and D. J. Sathe, *Journal of Alloys and Compounds*, 2010, **506**, 673-677.
5. H.-W. Li, Z. Guan, Y. Cheng, T. Lui, Q. Yang, C.-S. Lee, S. Chen and S.-W. Tsang, *Advanced Electronic Materials*, 2016, **2**, 1600200-1600209.
6. V. Narasimhan, D. Jiang and S.-Y. Park, *Applied Energy*, 2016, **162**, 450-459.
7. Q. An, F. Zhang, W. Gao, Q. Sun, M. Zhang, C. Yang and J. Zhang, *Nano Energy*, 2018, **45**, 177-183.
8. L. Zhao, S. Zhao, Z. Xu, Q. Yang, D. Huang and X. Xu, *Nanoscale*, 2015, **7**, 5537-5544.
9. Y. Zhu, A. Gadisa, Z. Peng, M. Ghasemi, L. Ye, Z. Xu, S. Zhao and H. Ade, *Advanced Energy Materials*, 2019, **9**.
